# Supplementary material
Source: PubMed Central journal article supplement (PMC7964327)
Supplement: 14-00925.pdf [file 14-00925.pdf]

**On-line Table 1: Demographic characteristics, risk factors, prediagnostic symptomatic interval, and time to neuroimaging follow-up in 24 children with AIS**

| Patient | Age    | Sex | Risk Factors                 | PSI (days) | Time to Neuroimaging Follow-Up (days) |
|---------|--------|-----|------------------------------|------------|---------------------------------------|
| 1       | 13 yr  | M   | SCD and MMS                  | 1          | 111                                   |
| 2       | 7 yr   | M   | NA                           | 1          | 2                                     |
| 3       | 1 mo   | F   | CHD                          | 2          | 3                                     |
| 4       | 2 yr   | M   | Meningitis                   | 6          | 22                                    |
| 5       | 15 yr  | F   | CHD                          | 4          | 186                                   |
| 6       | 7 mo   | M   | NA                           | 1          | NA                                    |
| 7       | 2 days | M   | NA                           | 0          | NA                                    |
| 8       | 2 days | F   | Prothrombin G20210A mutation | 2          | NA                                    |
| 9       | 7 yr   | F   | NA                           | 1          | 13                                    |
| 10      | 6 yr   | F   | DM I                         | 2          | 27                                    |
| 11      | 17 yr  | F   | CHD                          | 4          | 2                                     |
| 12      | 1 yr   | M   | SCD                          | 1          | 4                                     |
| 13      | 1 yr   | F   | NAT                          | 3          | NA                                    |
| 14      | 3 days | M   | NA                           | 4          | NA                                    |
| 15      | 1 yr   | M   | CHD                          | 0          | 198                                   |
| 16      | 8 yr   | M   | Lipoprotein A ↑              | 2          | 6                                     |
| 17      | 2 days | M   | Placenta infarction          | 2          | NA                                    |
| 18      | 4 yr   | M   | SCD                          | 0          | 1                                     |
| 19      | 5 yr   | M   | MMS                          | 1          | 62                                    |
| 20      | 3 days | F   | NA                           | 2          | NA                                    |
| 21      | 14 yr  | M   | SCD and MMS                  | 0          | NA                                    |
| 22      | 2 yr   | F   | CNephS                       | NA         | 50                                    |
| 23      | 4 yr   | F   | CHD                          | 7          | NA                                    |
| 24      | 5 yr   | M   | MMS                          | 1          | 10                                    |

**Note:**—CHD indicates congenital heart disease; CNephS, congenital nephrotic syndrome; DM I, diabetes mellitus type I; MMS, Moyamoya syndrome; NA, not applicable; NAT, nonaccidental trauma; SCD, sickle cell disease; ↑, elevated.

**On-line Table 2: ASPECTS vascular territory results in pediatric patients who had strokes that involved the left or right MCA territories and who had follow-up imaging**

|     |   | SWI Findings (n = 14) |       |             |               | DWI/DTI Findings (n = 14) |           | ASL Findings (n = 4) |             |             |
|-----|---|-----------------------|-------|-------------|---------------|---------------------------|-----------|----------------------|-------------|-------------|
|     |   | Iso                   | Hyper | Mildly Hypo | Markedly Hypo | Normal                    | Decreased | Normal               | Perfusion ↓ | Perfusion ↑ |
| MCA |   |                       |       |             |               |                           |           |                      |             |             |
| M1  | R | 9                     | 2     | 2           | 1             | 10                        | 4         | 4                    | 0           | 0           |
|     | L | 8                     | 3     | 2           | 1             | 11                        | 3         | 3                    | 0           | 1           |
| M2  | R | 7                     | 1     | 5           | 1             | 9                         | 5         | 4                    | 0           | 0           |
|     | L | 8                     | 1     | 3           | 2             | 10                        | 4         | 3                    | 0           | 1           |
| M3  | R | 10                    | 1     | 2           | 1             | 13                        | 1         | 4                    | 0           | 0           |
|     | L | 11                    | 1     | 1           | 1             | 11                        | 3         | 4                    | 0           | 0           |
| M4  | R | 10                    | 1     | 2           | 1             | 9                         | 5         | 4                    | 0           | 0           |
|     | L | 8                     | 3     | 2           | 1             | 10                        | 4         | 3                    | 1           | 0           |
| M5  | R | 8                     | 1     | 4           | 1             | 6                         | 8         | 4                    | 0           | 0           |
|     | L | 8                     | 1     | 3           | 2             | 9                         | 5         | 3                    | 1           | 0           |
| M6  | R | 10                    | 2     | 1           | 1             | 8                         | 6         | 4                    | 0           | 0           |
|     | L | 10                    | 2     | 1           | 1             | 11                        | 3         | 4                    | 0           | 0           |

**Note:**—Iso indicates isointense; Hyper, hyperintense; Hypo, hypointense; ↑, increased; ↓, decreased; R, right; L, left.
